# Supplementary material
Source: Springer Nature journal article supplement (https://www.springermedizin.de/resource/supplementary/12885_2012_3384_MOESM6_ESM.pdf/9463626)

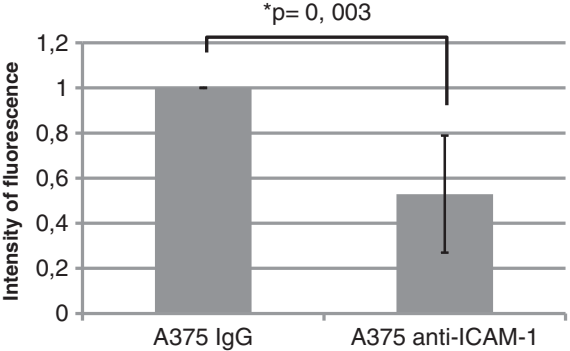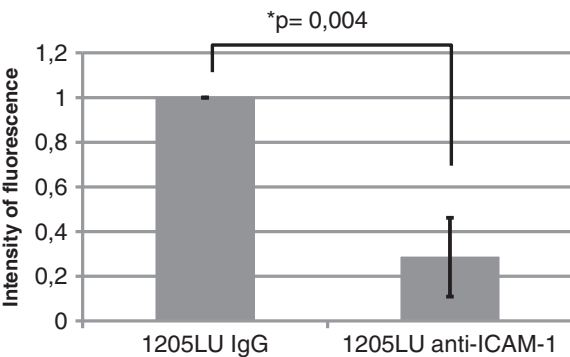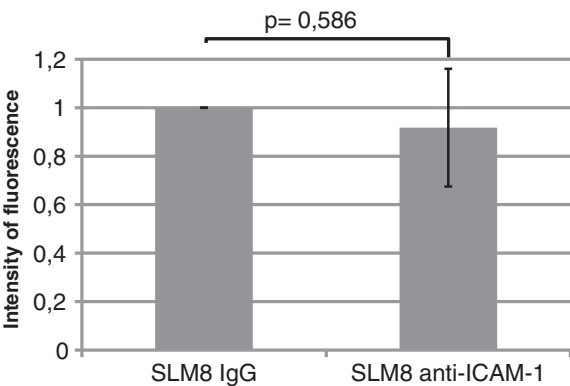

Supplement: MOESM6 [file 9463626]
